# Supplementary material for: Glycerol and Fatty Acids in Serum Predict the Development of Hyperglycemia and Type 2 Diabetes in Finnish Men
Source: PubMed Central journal article supplement — Diabetes Care. 2013 Oct 15;36(11):3732–8. doi: 10.2337/dc13-0800 (PMC3816902; doi:10.2337/dc13-0800), 2013-10-15
Supplement: supp_dc13-0800v130800_DC130800SupplementaryData.pdf [file supp_dc13-0800v130800_DC130800SupplementaryData.pdf]

SUPPLEMENTARY DATA

**Supplementary Table 1.** Pearson correlations of baseline levels of glycerol, fasting free fatty acids and omega fatty acids with age, BMI and traits of glucose metabolism in non-diabetic subjects (N=8566-8749).

| Variable                                                   | Glycerol |                        | Fasting FFAs |                        | Omega-3 FAs |                       | Docosahexaenoic acid |                       | Omega-6 FAs |                        | Linoleic acid |                        | Monounsaturated FAs |                        | Saturated and omega-7&9 FAs |                         |
|------------------------------------------------------------|----------|------------------------|--------------|------------------------|-------------|-----------------------|----------------------|-----------------------|-------------|------------------------|---------------|------------------------|---------------------|------------------------|-----------------------------|-------------------------|
|                                                            | <i>r</i> | <i>P</i>               | <i>r</i>     | <i>P</i>               | <i>r</i>    | <i>P</i>              | <i>r</i>             | <i>P</i>              | <i>R</i>    | <i>P</i>               | <i>r</i>      | <i>P</i>               | <i>r</i>            | <i>P</i>               | <i>r</i>                    | <i>P</i>                |
| Age, y                                                     | 0.064    | 2.2x10 <sup>-09</sup>  | 0.076        | 9.0x10 <sup>-13</sup>  | 0.117       | 7.2x10 <sup>-28</sup> | 0.155                | 1.4x10 <sup>-47</sup> | 0.044       | 5.2x10 <sup>-5</sup>   | 0.016         | 0.130                  | 0.098               | 4.9x10 <sup>-20</sup>  | 0.075                       | 4.1x10 <sup>-12</sup>   |
| BMI, kg/m <sup>2</sup>                                     | 0.248    | 9.3x10 <sup>-122</sup> | 0.113        | 4.6x10 <sup>-26</sup>  | -           | 0.013                 | 0.006                | 0.574                 | 0.306       | 3.0x10 <sup>-186</sup> | -             | 3.9x10 <sup>-208</sup> | 0.242               | 2.0x10 <sup>-115</sup> | 0.313                       | 8.3x10 <sup>-196</sup>  |
| FPG, mmol/L                                                | 0.125    | 1.9x10 <sup>-31</sup>  | 0.121        | 6.9x10 <sup>-30</sup>  | 0.034       | 1.4x10 <sup>-3</sup>  | 0.036                | 7.9x10 <sup>-4</sup>  | 0.185       | 1.5x10 <sup>-67</sup>  | -             | 2.7x10 <sup>-75</sup>  | 0.161               | 4.7x10 <sup>-51</sup>  | 0.171                       | 4.8x10 <sup>-58</sup>   |
| 2hPG, mmol/L                                               | 0.263    | 2.6x10 <sup>-136</sup> | 0.313        | 2.4x10 <sup>-198</sup> | 0.032       | 3.0x10 <sup>-3</sup>  | 0.045                | 2.6x10 <sup>-5</sup>  | 0.258       | 1.7x10 <sup>-131</sup> | -             | 2.5x10 <sup>-139</sup> | 0.187               | 1.3x10 <sup>-68</sup>  | 0.241                       | 2.9x10 <sup>-114</sup>  |
| Fasting insulin, pmol/L                                    | 0.270    | 5.4x10 <sup>-144</sup> | 0.106        | 3.0x10 <sup>-23</sup>  | -           | 3.0x10 <sup>-10</sup> | -0.051               | 1.8x10 <sup>-6</sup>  | 0.366       | 1.8x10 <sup>-271</sup> | -             | 7.9x10 <sup>-238</sup> | 0.302               | 4.4x10 <sup>-181</sup> | 0.382                       | 1.0x10 <sup>-298</sup>  |
| 2h Insulin, pmol/L                                         | 0.299    | 1.5x10 <sup>-177</sup> | 0.195        | 1.4x10 <sup>-75</sup>  | 0.001       | 0.96                  | 0.023                | 0.036                 | 0.315       | 1.3x10 <sup>-197</sup> | -             | 7.9x10 <sup>-186</sup> | 0.239               | 1.1x10 <sup>-112</sup> | 0.314                       | 2.7x10 <sup>-196</sup>  |
| Matsuda ISI, mg/dL, mU/L                                   | -        | 1.5x10 <sup>-186</sup> | -            | 2.9x10 <sup>-47</sup>  | 0.053       | 1.3x10 <sup>-6</sup>  | 0.038                | 4.4x10 <sup>-4</sup>  | 0.386       | 1.3x10 <sup>-303</sup> | -             | 1.3x10 <sup>-275</sup> | 0.315               | 8.0x10 <sup>-197</sup> | -                           | <1.1x10 <sup>-282</sup> |
| InsAUC <sub>0-30</sub> /GluAUC <sub>0-30</sub> , pmol/mmol | 0.164    | 4.0x10 <sup>-53</sup>  | -            | 6.7x10 <sup>-3</sup>   | 0.068       | 3.5x10 <sup>-10</sup> | -0.066               | 1.2x10 <sup>-9</sup>  | 0.235       | 3.2x10 <sup>-108</sup> | -             | 9.9x10 <sup>-83</sup>  | 0.200               | 5.5x10 <sup>-78</sup>  | 0.254                       | 5.3x10 <sup>-127</sup>  |

FFA, free fatty acid; FA, fatty acid, BMI, body mass index. FPG, fasting plasma glucose; 2hPG, 2-hour plasma glucose; Matsuda ISI, Matsuda insulin sensitivity index, InsAUC<sub>0-30</sub>/GluAUC<sub>0-30</sub> AUC, Insulin area under curve 0-30 / Glucose area under the curve 0-30 minutes. Glycerol and fasting FFA are given in mmol/L, all others (omega 3 FAs, docosahexaenoic acid, omega-6 FAs, linoleic acid, monounsaturated FAs, and saturated FAs and omega 7&9 FAs) as percentage of total FAs. All traits were logarithmically transformed to correct for their skewed distribution, except for age.

SUPPLEMENTARY DATA

**Supplementary Table 2.** Partial correlations of baseline levels of glycerol, fasting free fatty acids and omega fatty acids with traits of glucose metabolism in non-diabetic subjects adjusted for age and BMI (N=8566-8749).

| Variable                                                    | Glycerol |                       | Fasting FFAs |                        | Omega-3 FAs |                       | Docosahexaenoic acid |                       | Omega-6 FAs |                        | Linoleic acid |                        | Monounsaturated FAs |                        | Saturated and omega-7&9 FAs |                        |
|-------------------------------------------------------------|----------|-----------------------|--------------|------------------------|-------------|-----------------------|----------------------|-----------------------|-------------|------------------------|---------------|------------------------|---------------------|------------------------|-----------------------------|------------------------|
|                                                             | <i>r</i> | <i>P</i>              | <i>r</i>     | <i>P</i>               | <i>r</i>    | <i>P</i>              | <i>r</i>             | <i>P</i>              | <i>R</i>    | <i>P</i>               | <i>r</i>      | <i>P</i>               | <i>r</i>            | <i>P</i>               | <i>r</i>                    | <i>P</i>               |
| FPG, mmol/L                                                 | 0.067    | 4.2x10 <sup>-10</sup> | 0.095        | 4.0x10 <sup>-19</sup>  | 0.040       | 2.4x10 <sup>-4</sup>  | 0.032                | 2.7x10 <sup>-3</sup>  | 0.121       | 1.7x10 <sup>-29</sup>  | 0.128         | 9.3x10 <sup>-33</sup>  | 0.111               | 5.3x10 <sup>-25</sup>  | 0.105                       | 9.6x10 <sup>-23</sup>  |
| 2hPG, mmol/L                                                | 0.205    | 2.1x10 <sup>-82</sup> | 0.288        | 4.5x10 <sup>-166</sup> | 0.020       | 0.069                 | 0.018                | 0.089                 | 0.207       | 1.5x10 <sup>-84</sup>  | 0.207         | 4.2x10 <sup>-84</sup>  | 0.154               | 3.9x10 <sup>-47</sup>  | 0.193                       | 3.0x10 <sup>-73</sup>  |
| Fasting insulin, pmol/L                                     | 0.155    | 1.7x10 <sup>-47</sup> | 0.047        | 1.0x10 <sup>-5</sup>   | 0.067       | 5.5x10 <sup>-10</sup> | -0.072               | 2.9x10 <sup>-11</sup> | 0.240       | 3.7x10 <sup>-113</sup> | 0.198         | 3.2x10 <sup>-77</sup>  | 0.203               | 3.5x10 <sup>-81</sup>  | 0.257                       | 1.2x10 <sup>-130</sup> |
| 2h Insulin, pmol/L                                          | 0.217    | 2.1x10 <sup>-92</sup> | 0.154        | 2.4x10 <sup>-47</sup>  | 0.009       | 0.392                 | -0.006               | 0.595                 | 0.234       | 2.9x10 <sup>-107</sup> | 0.211         | 1.0x10 <sup>-87</sup>  | 0.183               | 1.6x10 <sup>-65</sup>  | 0.236                       | 1.8x10 <sup>-109</sup> |
| Matsuda ISI, mg/dL, mU/L                                    | -0.200   | 3.3x10 <sup>-78</sup> | -0.103       | 7.5x10 <sup>-22</sup>  | 0.057       | 1.5x10 <sup>-7</sup>  | 0.065                | 1.3x10 <sup>-9</sup>  | 0.273       | 6.5x10 <sup>-147</sup> | 0.237         | 2.7x10 <sup>-110</sup> | -0.230              | 1.4x10 <sup>-103</sup> | 0.286                       | 7.1x10 <sup>-162</sup> |
| InsAUC <sub>0-30</sub> / GluAUC <sub>0-30</sub> , pmol/mmol | 0.064    | 2.2x10 <sup>-9</sup>  | 0.088        | 2.8x10 <sup>-16</sup>  | 0.063       | 5.1x10 <sup>-9</sup>  | -0.077               | 9.4x10 <sup>-13</sup> | 0.120       | 9.5x10 <sup>-29</sup>  | 0.077         | 7.3x10 <sup>-13</sup>  | 0.109               | 4.0x10 <sup>-24</sup>  | 0.139                       | 2.3x10 <sup>-38</sup>  |

FFA, free fatty acid; FA, fatty acid, BMI, body mass index. FPG, fasting plasma glucose; 2hPG, 2-hour plasma glucose; Matsuda ISI, Matsuda insulin sensitivity index, InsAUC<sub>0-30</sub>/GluAUC<sub>0-30</sub> AUC, Insulin area under the curve 0-30 / Glucose area under the curve 0-30 minutes. Glycerol and fasting FFA are given in mmol/L, all others (omega 3 FAs, docosahexaenoic acid, omega-6 FAs, linoleic acid, monounsaturated FAs, and saturated FAs and omega 7&9 FAs) as percentage of total FAs. All traits were logarithmically transformed to correct for their skewed distribution, except for age.
